# Supplementary material for: Upregulation of Hepatic Glutathione S-Transferase Alpha 1 Ameliorates Metabolic Dysfunction-Associated Steatosis by Degrading Fatty Acid Binding Protein 1
Source: MDPI journal article supplement (doi:10.3390/ijms25105086), 2024-05-07
Supplement: s1 [file s1]

# Upregulation of Hepatic Glutathione S-Transferase Alpha 1 Ameliorates Metabolic Dysfunction-Associated Steatosis by Degrading Fatty Acid Binding Protein 1

Jing Jiang <sup>1</sup>, Hu Li <sup>1,2,\*</sup>, Mei Tang <sup>1</sup>, Lei Lei <sup>1</sup>, Hong-Ying Li <sup>1</sup>, Biao Dong <sup>1,2</sup>, Jian-Rui Li <sup>1,3</sup>, Xue-Kai Wang <sup>1</sup>, Han Sun <sup>1</sup>, Jia-Yu Li <sup>1</sup>, Jing-Chen Xu <sup>1</sup>, Yue Gong <sup>1</sup>, Jian-Dong Jiang <sup>1,2,3</sup> and Zong-Gen Peng <sup>1,2,3,\*</sup>

<sup>1</sup> CAMS Key Laboratory of Antiviral Drug Research, Institute of Medicinal Biotechnology, Chinese Academy of Medical Sciences & Peking Union Medical College, Beijing 100050, China; lihongying018@163.com (H.-Y.L.)

<sup>2</sup> Key Laboratory of Biotechnology of Antibiotics, The National Health and Family Planning Commission (NHFPC), Institute of Medicinal Biotechnology, Chinese Academy of Medical Sciences & Peking Union Medical College, Beijing 100050, China

<sup>3</sup> Beijing Key Laboratory of Antimicrobial Agents, Institute of Medicinal Biotechnology, Chinese Academy of Medical Sciences & Peking Union Medical College, Beijing 100050, China

\* Correspondence: lihu0112@imb.pumc.edu.cn (H.L.); pengzonggen@imb.pumc.edu.cn (Z.-G.P.); Tel.: +86-10-63166129 (Z.-G.P.); Fax: +86-10-63165281 (H.L.)

Supplementary Table S1 qRT-PCR Primer

| GENE                | Primer (5'-3') |                           |
|---------------------|----------------|---------------------------|
| Human <i>TAGLN</i>  | Forward        | AGCGTCCTGGATCTCTCTCA      |
|                     | Reverse        | ATGTCTGGGGAAAGCTCCTT      |
| Human <i>CPT1A</i>  | Forward        | TCCAGTTGGCTTATCGTGGTG     |
|                     | Reverse        | TCCAGAGTCCGATTGATTTTTGC   |
| Human <i>MVP</i>    | Forward        | AGGGCTTGGTGCTGTTTGATGTC   |
|                     | Reverse        | ATCTCCACGACCTCCACTTCCTTC  |
| Human <i>FTL</i>    | Forward        | GCGATGATGTGGCTCTGGAAGG    |
|                     | Reverse        | TGTGGAGGTTGGTCAGGTGGTC    |
| Human <i>CD63</i>   | Forward        | TTCAACGAGAAGGCGATCCATAAGG |
|                     | Reverse        | CAGATGAGGAGGCTGAGGAGACC   |
| Human <i>TTYH3</i>  | Forward        | TGCTGAATGGCACGGAGGTGAA    |
|                     | Reverse        | CTCCACGCCGTCATAGCAGAAG    |
| Human <i>KRT19</i>  | Forward        | GGCGATGTGCGAGCTGATAGTG    |
|                     | Reverse        | GTCCCTTCCTTCCCATCCCTCTAC  |
| Human <i>PLIN2</i>  | Forward        | ACCTCATGTCCTCAGCCTATCTCAG |
|                     | Reverse        | CAGTCACAGTAGTCGTCACAGCATC |
| Human <i>MTMR11</i> | Forward        | CAGCACGGTCAACGAGAGGTTC    |
|                     | Reverse        | CTACAGATGAATCAGGCAGGCAGAG |
| Human <i>FTH1</i>   | Forward        | TCCTACGTTTACCTGTCCATGT    |
|                     | Reverse        | GTTTGTGCAGTTCCAGTAGTGA    |
| Human <i>CPLX2</i>  | Forward        | GATCCTGGACAATACCTCGGAG    |
|                     | Reverse        | CTCCACAGCATCAAGAGACTGC    |
| Human <i>H2AC14</i> | Forward        | GTGGTAAGCAGGGAGGCAAAGC    |

|                      |         |                            |
|----------------------|---------|----------------------------|
|                      | Reverse | GCGGGATGATGCGAGTCTTCTTG    |
| Human <i>TSPAN3</i>  | Forward | GCTTGGAGGCTGGATAGGCTTTG    |
|                      | Reverse | CCACCTTCTTCTCAGTTCACCTTCC  |
| Human <i>MAP1B</i>   | Forward | ATCTCGACACTCTGCAAGATTCT    |
|                      | Reverse | TGTTTCTAAAACGTCACTTCGGT    |
| Human <i>FABP1</i>   | Forward | TCGGAAATCGTGCAGAATGGGAAG   |
|                      | Reverse | TGGTGATTATGTGCGCCGTTGAGTTC |
| Human <i>PRKARIA</i> | Forward | AGCACACTGAGAAAGCGGAAGATG   |
|                      | Reverse | GGCAGCACGAGGACGATTTCATC    |
| Human <i>IGFBP1</i>  | Forward | TTGGGACGCCATCAGTACCTA      |
|                      | Reverse | TTGGCTAAACTCTCTACGACTCT    |
| Human <i>SCD1</i>    | Forward | CGTTGCCACTTTCTTGCGATATGC   |
|                      | Reverse | TGAAGTTGATGTGCCAGCGGTAC    |
| Human <i>GPAT1</i>   | Forward | CCAGTGATGCTGCTGATGAAGGTAG  |
|                      | Reverse | CGTTCCTGCTAGTGTGGGTGATTG   |
| Human <i>GPAT2</i>   | Forward | TGTGGTCCAGGCGGTCATAGAG     |
|                      | Reverse | AGCTTCTGGCACTGACGATGTATTC  |
| Human <i>GPAT3</i>   | Forward | CGCTATTGTGTCCTACTGCCTCTG   |
|                      | Reverse | TTCCCATCAAGCCGCCATGAAC     |
| Human <i>GPAT4</i>   | Forward | CGTACCTGCTGCGAATGATGACC    |
|                      | Reverse | GCTTCTGCTGCTCCTCCTTGAAC    |
| Human <i>LIPIN</i>   | Forward | GGCTGCTAAGTCTTCTTCTCCACAC  |
|                      | Reverse | TGCTCCTAAGGTCTCCAGGTCTTC   |
| Human <i>DGAT1</i>   | Forward | ACTCCGAGTCTGTACCTACTTCTG   |
|                      | Reverse | GGCTATTGGCTGTCCGATGATGAG   |
| Human <i>DGAT2</i>   | Forward | AGGTCATCTCAGTGCTCCAGTGG    |
|                      | Reverse | CGGAAGTTGCCTGCCAGTGTAG     |
| Human <i>ACSS2</i>   | Forward | TTTGCTGCTTCTGTTCTGGGTCTG   |
|                      | Reverse | GTCTCTTATGGGCTGGGTTCTGTTC  |
| Human <i>ACSS3</i>   | Forward | GAACAAACACTCGCCCTCTACCAG   |
|                      | Reverse | ATGCCATGCTTGACCAAGACACC    |
| Human <i>SREBP1</i>  | Forward | TACCACCAGCGTCTACCATAGCC    |
|                      | Reverse | CTTGCGATGCCTCCAGAAGTACAC   |
| Human <i>FAS</i>     | Forward | CAATTCTGCCATAAGCCCTGTCCCTC |
|                      | Reverse | ACTTGGTGTTGCTGGTGAGTGTG    |
| Human <i>CPT2</i>    | Forward | CGCTTTGTGCCTTCCTCTCTGTC    |
|                      | Reverse | TCTCGGTTCTCACTGGTCAGGTATG  |
| Human <i>ACOX1</i>   | Forward | CCGCCTGGAAC TTGGAGATCATTG  |
|                      | Reverse | GGTCCCGATTTCACGAATAGGTACG  |
| Human <i>ACC1</i>    | Forward | TGTCCTTCTCCTCCAACCTCAACC   |
|                      | Reverse | CTGCCAGCCTGTCATCCTCAATATC  |
| Human <i>ACC2</i>    | Forward | GGTGAAGGAAGGTGTGGAAGTGAC   |
|                      | Reverse | ATTGGTGATGAACAGGCGGATGG    |
| Human <i>ACSL1</i>   | Forward | ACTCTTCCGACCAACACGCTTATG   |

|                     |         |                            |
|---------------------|---------|----------------------------|
|                     | Reverse | CTTCTGGATCAGTGCTGAGCCTATG  |
| Human <i>ACSL4</i>  | Forward | TGGGCTAAATGAATCTGAGGCTTCC  |
|                     | Reverse | GGCGTTGGTCTACTTGGAGGAATG   |
| Human <i>CD36</i>   | Forward | GGCTGTCATTGGTGCTGTCCTG     |
|                     | Reverse | TGCTGCTGTTTCATCATCACTTCCTG |
| Human <i>FATP1</i>  | Forward | ACAGTCGTCCTCCGCAAGAAATTC   |
|                     | Reverse | AGCAGCTCCATTGTGTCCTCATTG   |
| Human <i>FATP2</i>  | Forward | AGCGGATTGAAGGCAGATGATGTC   |
|                     | Reverse | CTCCTCGTAAGCCATTTCCCAGTG   |
| Human <i>FATP3</i>  | Forward | CAAGTTCTCGGCTGGTCAGTTCTG   |
|                     | Reverse | CGCTGTCCTGTGTAGTTGATGGTG   |
| Human <i>FATP4</i>  | Forward | CAATAGCCGCATCCTGTCCTTCG    |
|                     | Reverse | CTCGTCCATCACCAGCACATCAC    |
| Human <i>FATP5</i>  | Forward | AGCCCTGCCCTCTTCATCTATAACC  |
|                     | Reverse | TCCCACACATCAGCCCGTAGTC     |
| Human <i>FATP6</i>  | Forward | TTGGGATGACTTCTGGTTCGTGTTG  |
|                     | Reverse | GGAGGGAGTTGGAGCGAATGTTG    |
| Human <i>GSTA1</i>  | Forward | CTGCCCCGTATGTCCACCTG       |
|                     | Reverse | AGCTCCTCGACGTAGTAGAGA      |
| Human <i>GAPDH</i>  | Forward | CGGAGTCAACGGATTTGGTCGTAT   |
|                     | Reverse | AGCCTTCTCCATGGTGGTGAAGAC   |
| Murine <i>Gsta1</i> | Forward | GCAGACCAGAGCCATTCTCAACTAC  |
|                     | Reverse | AGGCTGCTGATTCTGCTCTTGAAG   |
| Murine <i>Gapdh</i> | Forward | CTCTGGAAAGCTGTGGCGTGATG    |
|                     | Reverse | ATGCCAGTGAGCTTCCCGTTCAG    |
